# Supplementary material for: Confinement effects on alloy reactivity
Source: Royal Society of Chemistry journal article supplement (doi:10.1039/c0cp00464b), 2010-01-01
Supplement: c0cp00464b.pdf [file c0cp00464b.pdf]

**Table S-1.** For each system, surface-surface separation distances (in Å) were selected to study the surface d-band center (referred to the Fermi level) and charge (in e), shown in parenthesis after the distance.

| System: | d-band center (eV) and surface charge as a function of H (Å)                                                                                                                                                                       | change d-band |
|---------|------------------------------------------------------------------------------------------------------------------------------------------------------------------------------------------------------------------------------------|---------------|
| Pt      | <b>4.30Å</b> (-1.996;-0.043); <b>4.61Å</b> (-2.004;-0.047); <b>4.79Å</b> (-2.006;-0.045); <b>4.97Å</b> (-2.008;-0.046);<br><b>5.08Å</b> (-2.008;-0.046); <b>5.96Å</b> (-2.012;-0.045); <b>12.00Å</b> (-2.017;0.042)                | very small    |
| Ag/Pt   | <b>3.88Å</b> (-3.834; 0.082); <b>4.10Å</b> (-3.848; 0.080); <b>4.23Å</b> (-3.843; 0.079); <b>5.66Å</b> (-3.836;0.082); <b>5.89Å</b><br>(-3.840; 0.081); <b>6.20Å</b> (-3.841;0.081); <b>12.00Å</b> (-3.842;0.082)                  | ----          |
| Au/Pt   | <b>3.98Å</b> (-3.248; -0.0034); <b>4.12Å</b> (-3.248; -0.0025); <b>4.23Å</b> (-3.245; -0.0068); <b>5.48Å</b> (-3.252; -<br>0.0043); <b>5.59Å</b> (-3.256; -0.0072); <b>6.18Å</b> (-3.255;-0.0022) ; <b>12.00Å</b> (-3.252;-0.0039) | ----          |
| Co/Pt   | <b>3.82Å</b> (-1.207; 0.23); <b>3.92Å</b> (-1.207; 0.23); <b>4.07Å</b> (-1.207; 0.23); <b>4.80Å</b> (-1.441; 0.23); <b>5.31Å</b> (-<br>1.441;0.23); <b>6.13Å</b> (-1.440; 0.23); <b>12.00Å</b> (-1.435;0.23)                       | large         |
| Cu/Pt   | <b>3.91Å</b> (-1.783; 0.16); <b>4.00Å</b> (-1.786; 0.16); <b>4.12Å</b> (-1.787; 0.16); <b>5.61Å</b> (-1.801; 0.16); <b>5.81Å</b> (-<br>1.805; 0.16); <b>6.11Å</b> (-1.802; 0.16); <b>12.00Å</b> (-1.806;0.16)                      | small         |
| Fe/Pt   | <b>3.62Å</b> (0.844; 0.28); <b>3.77Å</b> (0.855; 0.28); <b>4.02Å</b> (0.854; 0.28); <b>5.64Å</b> (0.866; 0.29); <b>5.85Å</b> (0.864;<br>0.29); <b>6.14Å</b> (0.863; 0.29); <b>12.00Å</b> (0.870;0.29)                              | very small    |
| Ir/Pt   | <b>3.85Å</b> (-1.53; 0.0007); <b>3.95Å</b> (-1.541; -0.00025); <b>4.10Å</b> (-1.543; -0.00065); <b>5.62Å</b> (-1.554;<br>0.0017); <b>5.82Å</b> (-1.554; -0.0065); <b>6.13Å</b> (-1.554; -0.0057); <b>12.00Å</b> (-1.548;-0.0057)   | very small    |
| Ni/Pt   | <b>3.80Å</b> (-1.169; 0.17); <b>3.95Å</b> (-1.171; 0.16); <b>4.10Å</b> (-1.173; 0.16); <b>5.50Å</b> (-1.174; 0.16); <b>5.81Å</b> (-<br>1.175; 0.17); <b>6.10Å</b> (-1.175; 0.16); <b>12.00Å</b> (-1.177;0.16)                      | ----          |
| Pd/Pt   | <b>3.81Å</b> (-1.539; 0.018); <b>4.00Å</b> (-1.55; 0.014); <b>4.12Å</b> (-1.556; 0.014); <b>5.11Å</b> (-1.712; 0.0092); <b>5.31Å</b><br>(-1.713; 0.014); <b>6.12Å</b> (-1.716; 0.011)                                              | large         |
| Re/Pt   | <b>4.46Å</b> (-0.277;0.20); <b>4.80Å</b> (-0.241;0.20); <b>5.31Å</b> (-0.224;0.20); <b>6.42Å</b> (-0.223; 0.20); <b>6.62Å</b> (-<br>0.193; 0.21); <b>6.93Å</b> (-0.227; 0.20) ; <b>12.00Å</b> (-0.251;0.20)                        | small         |
| Ti/Pt   | <b>4.51Å</b> (0.743; 0.47); <b>4.89Å</b> (0.749; 0.48); <b>5.48Å</b> (0.768; 0.48); <b>6.64Å</b> (0.557; 0.48); <b>6.85Å</b> (0.568;<br>0.48); <b>7.17Å</b> (0.04; 0.48) ; <b>12.00Å</b> (0.03;0.48)                               | large         |

**Table S-2.** For each system six H separations (in Å) were selected to show changes in the oxygen charge (Q, in e), the oxygen p-band center (in eV, relative to the Fermi level), and surface d-band center (in eV, relative to the Fermi level).

| System | H    | E <sub>ad</sub> | Q (O) | p-band center for O | d-band surface center | System | H    | E <sub>ad</sub> | Q (O) | p-band center for O | d-band surface center |
|--------|------|-----------------|-------|---------------------|-----------------------|--------|------|-----------------|-------|---------------------|-----------------------|
| Ag/Pt  | 4.31 | 0.56            | -0.53 | -8.67               | -2.13                 | Ir/Pt  | 4.09 | -2.94           | -0.71 | -7.44               | -2.45                 |
|        | 4.48 | 0.15            | -0.54 | -8.40               | -2.11                 |        | 4.23 | -3.31           | -0.74 | -7.28               | -2.44                 |
|        | 4.67 | -0.12           | -0.54 | -8.12               | -2.08                 |        | 4.53 | -3.77           | -0.73 | -6.98               | -2.42                 |
|        | 5.23 | 0.25            | -0.60 | -1.28               | -1.99                 |        | 5.40 | -4.11           | -0.73 | -6.52               | -2.40                 |
|        | 5.88 | 0.014           | -0.27 | -5.61               | -2.04                 |        | 5.76 | -0.12           | -0.25 | -5.61               | -2.65                 |
|        | 6.21 | 0.020           | -0.19 | -7.15               | -2.04                 |        | 6.12 | -0.04           | -0.19 | -6.61               | -2.67                 |
| Au/Pt  | 4.41 | 2.01            | -0.42 | -6.84               | -2.17                 | Ni/Pt  | 4.00 | -4.38           | -0.83 | -5.74               | -2.54                 |
|        | 4.59 | 1.54            | -0.43 | -9.07               | -2.15                 |        | 4.18 | -4.70           | -0.82 | -5.65               | -2.54                 |
|        | 4.80 | 1.16            | -0.43 | -8.74               | -2.12                 |        | 4.46 | -5.00           | -0.81 | -5.52               | -2.53                 |
|        | 4.97 | 1.45            | -0.57 | -1.46               | -2.08                 |        | 5.23 | -5.28           | -0.84 | -5.30               | -2.52                 |
|        | 5.61 | 0.70            | -0.17 | -5.79               | -2.04                 |        | 5.64 | -0.57           | -0.43 | -5.58               | -2.55                 |
|        | 6.26 | 0.26            | -0.08 | -7.60               | -2.05                 |        | 6.04 | -0.34           | -0.16 | -6.51               | -2.59                 |
| Co/Pt  | 4.01 | -4.91           | -0.95 | -5.22               | -2.55                 | Pd/Pt  | 4.18 | -0.96           | -0.61 | -6.17               | -2.16                 |
|        | 4.17 | -5.16           | -0.93 | -5.18               | -2.56                 |        | 4.34 | -1.37           | -0.60 | -5.99               | -2.15                 |
|        | 4.48 | -5.48           | -0.94 | -5.10               | -2.57                 |        | 4.58 | -1.73           | -0.61 | -5.71               | -2.14                 |
|        | 5.40 | -5.86           | -0.96 | -4.97               | -2.58                 |        | 4.93 | -2.00           | -0.65 | -5.59               | -2.11                 |
|        | 5.78 | -5.90           | -0.96 | -4.98               | -2.57                 |        | 5.20 | -0.56           | -0.29 | -5.59               | -2.06                 |
|        | 6.04 | -0.39           | -0.23 | -5.91               | -2.67                 |        | 6.12 | -0.10           | -0.06 | -7.05               | -2.10                 |
| Cu/Pt  | 4.04 | -2.57           | -0.87 | -4.88               | -2.18                 | Re/Pt  | 4.39 | -6.40           | -0.89 | -6.19               | -2.89                 |
|        | 4.21 | -2.77           | -0.88 | -4.78               | -2.39                 |        | 4.56 | -6.85           | -0.92 | -5.97               | -2.88                 |
|        | 4.49 | -3.03           | -0.86 | -4.65               | -2.39                 |        | 5.32 | -7.27           | -0.92 | -5.72               | -2.87                 |
|        | 5.47 | -3.33           | -0.90 | -4.46               | -2.38                 |        | 6.12 | -7.30           | -0.93 | -5.67               | -2.87                 |
|        | 5.77 | -0.23           | -0.38 | -5.46               | -2.13                 |        | 6.63 | 0.17            | -0.13 | -6.96               | -3.04                 |
|        | 6.10 | -0.13           | -0.29 | -7.09               | -2.14                 |        | 6.94 | 0.15            | -0.01 | -7.32               | -3.05                 |
| Fe/Pt  | 4.11 | -5.50           | -0.98 | -5.45               | -2.56                 | Ti/Pt  | 4.75 | -10.7           | -1.07 | -5.40               | -2.66                 |
|        | 4.27 | -5.93           | -1.00 | -5.27               | -2.56                 |        | 5.00 | -11.1           | -1.06 | -5.34               | -2.66                 |
|        | 4.56 | -6.40           | -1.00 | -5.23               | -2.55                 |        | 5.51 | -11.4           | -1.08 | -5.25               | -2.65                 |
|        | 5.31 | -6.86           | -1.01 | -5.03               | -2.54                 |        | 6.35 | -11.5           | -1.09 | -5.23               | -2.66                 |
|        | 5.64 | -6.90           | -1.02 | -5.02               | -2.55                 |        | 6.66 | -0.72           | -0.36 | -5.62               | -2.70                 |
|        | 6.00 | -0.60           | -0.41 | -5.90               | -2.50                 |        | 6.95 | -0.17           | -0.27 | -5.87               | -2.70                 |

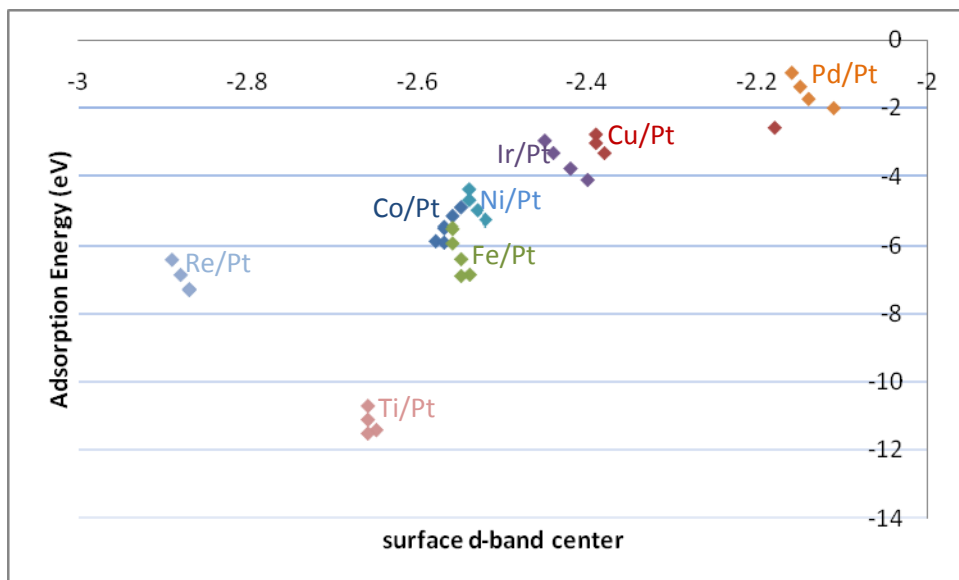

**Figure S1.** Surface d-band center as a function of adsorption energy defined as the energy gain or lost by taking both Oxygen atoms from the surface and forming molecular Oxygen in the gas phase.

**Table S-3.** Surface charges (in e), and d-band center (in eV) at the value of H indicated in parenthesis.

| System    | surface charge | d-band surface | System    | surface charge | d-band surface |
|-----------|----------------|----------------|-----------|----------------|----------------|
| <b>Ti</b> | 0.48           | 0.77 (5.48Å)   | <b>Fe</b> | 0.28           | 0.85 (4.02Å)   |
| <b>Co</b> | 0.23           | -1.21 (4.07Å)  | <b>Ni</b> | 0.16           | -1.17 (4.10Å)  |
| <b>Cu</b> | 0.16           | -1.79 (4.12Å)  |           |                |                |
| <b>Pd</b> | 0.014          | -1.56 (4.12Å)  | <b>Ag</b> | 0.079          | -3.84 (4.23Å)  |
| <b>Re</b> | 0.20           | -0.22 (5.31Å)  | <b>Ir</b> | -0.00065       | -1.54 (4.10Å)  |
| <b>Pt</b> | -0.045         | -2.006 (4.79Å) | <b>Au</b> | -0.0068        | -3.24 (4.23Å)  |
